# Supplementary material
Source: Springer Nature journal article supplement (https://www.springermedizin.de/resource/supplementary/12958_2010_762_MOESM2_ESM.pdf/9568426)

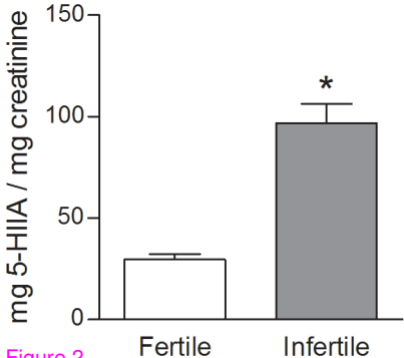

Figure 2

Supplement: MOESM2 [file 9568426]
